# Supplementary material for: Prevalence of sarcopenia was higher in women than in men: a cross-sectional study from a rural area in eastern China
Source: PeerJ journal article supplement (doi:10.7717/peerj.13678), 2022-08-02
Supplement: Questionnaire.pdf [file Questionnaire.pdf]

# 国家重点研发计划

(项目编号: 2018YFC2000301)

## 我国人群增龄过程中健康状况变化特点与规律研究 基线调查表

**ID1 入组标准: 是否符合入组标准**     是=1     否=2     **ID1**

- 1) 在当地具有相对稳定工作与居所的适龄本地居民;
- 2) 无急慢性传染性疾病;    3) 无进展性的致命性疾病;
- 4) 无精神疾患;    5) 无酗酒或滥用药物史;
- 6) 无犯罪记录;

**ID2 排除标准: 是否符合排除标准**     是=1     否=2     **ID2**

- 1) 一切具有迁徙、调动可能风险的人员。
- 2) 存在任何躯体或精神功能问题不能完成本调查者

**ID3 调查地点** \_\_\_\_\_省(市)    \_\_\_\_\_市    \_\_\_\_\_县     **ID3**

**ID4 本次调查编号:** □□□□□□□□□□     **ID4**

**ID5 调查日期:DATE** □□□□/□□/□□     **ID5**

**ID6 受访者来源:**    1=城市社区    2= 城市单位    3= 城镇     **ID6**  
4=农村    5=医院 (体检中心、门诊)    6=其他

**ID7 本次问卷调查员编码:** □□□□     **ID7**

2019年3月

## A 基本情况

- A1 姓名: \_\_\_\_\_  A1
- A2 性别: 1=男 2=女  A2
- A3 民族: 1=汉 2=蒙 3=回 4=藏 5=其他 \_\_\_\_\_ A3oth  A3
- A4 年龄: \_\_\_\_\_ 岁    A4
- A5 完成的最高教育:  A5  
1=文盲 2=小学 3=初中 4=高中/中专 5=大专 6=本科 7=硕士研究生 8=博士研究生
- A6 婚姻状况:  A6  
1=未婚 2=已婚同住 3=已婚分居 4=离异 5=丧偶
- A7 您现在的工作状况?  A7  
1=全职工作 2=兼职工作 3=不固定(打零工) 4=离/退休 5=无工作(跳问 A9)  
6=在学(跳问 A9) 7=其他 \_\_\_\_\_ A7oth(跳问 A9)
- A8 您目前工作或退休前及曾经的工作岗位是:  A8  
1=国家机关、党群组织、国有企业、事业单位负责人  
2=非国有机构、组织、企业负责人  
3=国有单位专业技术人员(科研、工程技术、医疗、经济、法律、教学、文学艺术、体育、媒体)  
4=非国有单位专业技术人员(科研、工程技术、医疗、经济、法律、教学、文学艺术、体育、媒体)  
5=国有单位办事人员、服务和有关人员(行政办公、安保、消防、邮政、电信、销售、仓储、餐饮、娱乐、运输、医疗辅助、社会服务)  
6=非国有办事人员、服务和有关人员(行政办公、安保、消防、邮政、电信、销售、仓储、餐饮、娱乐、运输、医疗辅助、社会服务)  
7=国有单位农、林、牧、渔、水利业生产人员  
8=非国有单位农、林、牧、渔、水利业生产人员  
9=国有单位生产运输设备操作人员(生产工人、工程施工人员、运输设备操作人员、环境监测与废物处理人员、检验、计量人员)  
10=非国有单位生产运输设备操作人员(生产工人、工程施工人员、运输设备操作人员、环境监测与废物处理人员、检验、计量人员)  
11=军人 12=其他 \_\_\_\_\_ A8oth

A8.1 退休后是否再就业? 1=是 2=否(跳问 A9)  A8.1

A8.2 再就业的工作岗位是:  A8.2

1=国家机关、党群组织、国有企业、事业单位负责人

2=非国有机构、组织、企业负责人

3=国有单位专业技术人员(科研、工程技术、医疗、经济、法律、教学、文学艺术、体育、媒体)

4=非国有单位专业技术人员(科研、工程技术、医疗、经济、法律、教学、文学艺术、体育、媒体)

5=国有单位办事人员、服务和有关人员(行政办公、安保、消防、邮政、电信、销售、仓储、餐饮、娱乐、运输、医疗辅助、社会服务)

6=非国有办事人员、服务和有关人员(行政办公、安保、消防、邮政、电信、销售、仓储、餐饮、娱乐、运输、医疗辅助、社会服务)

7=国有单位农、林、牧、渔、水利业生产人员

8=非国有单位农、林、牧、渔、水利业生产人员

9=国有单位生产运输设备操作人员(生产工人、工程施工人员、运输设备操作人员、环境监测与废物处理人员、检验、计量人员)

10=非国有单位生产运输设备操作人员(生产工人、工程施工人员、运输设备操作人员、环境监测与废物处理人员、检验、计量人员)

11=军人 12=其他\_\_\_\_\_A8.2oth

A9 现居住住址: \_\_\_\_\_省(自治区、直辖市) A9a \_\_\_\_\_市(地

区、州、盟) A9b \_\_\_\_\_区(县、市、旗) A9c \_\_\_\_\_乡(镇、街

道) A9d \_\_\_\_\_街、路、巷、胡同、里 A9e

\_\_\_\_\_小区 A9f \_\_\_\_\_门牌号 A9g

A10 本人联系方式: 手机\_\_\_\_\_ A10a 家庭电话\_\_\_\_\_ A10b

联系人姓名\_\_\_\_\_ A10c 电话/手机\_\_\_\_\_ A10d

A11 身份证号码:     A11

A12 信息来源:  A12

1=本人 2=家属 3=保姆 4=其他人\_\_\_\_\_ A12oth

## B 生活方式

B1 您对自己目前的生活满意吗?  B1

非常不满意

非常满意

|   |   |   |   |   |   |   |   |   |    |
|---|---|---|---|---|---|---|---|---|----|
| 1 | 2 | 3 | 4 | 5 | 6 | 7 | 8 | 9 | 10 |
|---|---|---|---|---|---|---|---|---|----|

B2 您每周工作 \_\_\_\_\_天 B2a, 每天工作约\_\_\_\_\_小时 B2b。  B2a   B2b

B3 您每天用于上班路上的时间(往返), 约\_\_\_\_\_小时。  B3

B4 您每周加班约\_\_\_\_\_小时。   B4

B5 请选择自己目前的工作方式?  B5

1=脑力劳动为主    2=体力劳动为主    3=脑体结合劳动    4=不清楚

B6 请对自己总体工作状态进行评价:  B6

1=我喜欢自己的工作, 没有感觉到倦怠。

2=有时感到有压力, 不像过去那样有精力, 但并没有感觉到倦怠。

3=的确感到倦怠, 比如体力或者情绪上的枯竭。

4=感受到的工作倦怠挥之不去, 常常在工作中感到沮丧。

5=感到精疲力竭, 常常怀疑能否继续下去。需要改变或者寻求帮助。

B7 您每天做家务(包括照看孩子、老人)的时间约\_\_\_\_\_小时。   B7

B8 您每天休闲的时间, 约\_\_\_\_\_小时。   B8

B9 在您闲暇时主要做什么?(多选)   B9

1=上网    2=逛街购物    3=旅游    4=看电影、演出/比赛    5=聊天聚会

6=棋牌    7=锻炼    8=看书/学习    9=其他\_\_\_\_\_ B9oth

B10 您每天晚上大约\_\_\_\_\_点上床休息 B10a, 睡眠时间约\_\_\_\_\_小时 B10b。

B10a   B10b

B11 您是否需要服用安眠药? 1=从不    2=经常    3=偶尔  B11

B12 您是否可以做到有规律地吃饭、睡觉、排便? 1=是    2=否  B12

**B13** 您是否经常参加体育锻炼?

**B13**

1=否(跳至 B14)

2=是, 请回答以下问题(可多选)

| 方式                                   | 种类举例                 | 次/周                                                      | 分钟/次                                                                              |
|--------------------------------------|----------------------|----------------------------------------------------------|-----------------------------------------------------------------------------------|
| B13.1 有氧运动 <input type="checkbox"/>  | 1=走路 2=跑步 3=游泳 4=广场舞 | <input type="checkbox"/> <input type="checkbox"/> B13.1a | <input type="checkbox"/> <input type="checkbox"/> <input type="checkbox"/> B13.1b |
| B13.2 平衡类运动 <input type="checkbox"/> | 1=太极拳 2=_____        | <input type="checkbox"/> <input type="checkbox"/> B13.2a | <input type="checkbox"/> <input type="checkbox"/> <input type="checkbox"/> B13.2b |
| B13.3 力量型运动 <input type="checkbox"/> | 1=器械 2=_____         | <input type="checkbox"/> <input type="checkbox"/> B13.3a | <input type="checkbox"/> <input type="checkbox"/> <input type="checkbox"/> B13.3b |
| B13.4 柔韧类运动 <input type="checkbox"/> | 1=瑜伽 2=_____         | <input type="checkbox"/> <input type="checkbox"/> B13.4a | <input type="checkbox"/> <input type="checkbox"/> <input type="checkbox"/> B13.4b |
| B13.5 球类运动 <input type="checkbox"/>  | 1=乒乓球 2=羽毛球 3=_____  | <input type="checkbox"/> <input type="checkbox"/> B13.5a | <input type="checkbox"/> <input type="checkbox"/> <input type="checkbox"/> B13.5b |

**B14** 您每月为自己的健康保健(保健品、按摩、美容、健身等)花费大约多少元钱?

**B14**

1=大于 5000 元

2=3001-5000

3=1501-3000 元

4=500-1500 元

5=500 元以下

6=不花费

**B15** 您的饮食习惯

B15.1 主食习惯:

**B15.1**

1=白米为主 \_\_\_\_两/天 B15.1a

2=面食为主 \_\_\_\_两/天 B15.1b

3=粗粮为主 \_\_\_\_两/天 B15.1c

4=米面兼有 \_\_\_\_两/天 B15.1d

B15.2 食肉习惯:

1=不吃

2=偶尔吃

3=经常吃

4=天天吃

**B15.2**

B15.3 食蛋习惯:

1=不吃

2=偶尔吃

3=经常吃

4=天天吃

**B15.3**

B15.4 食鱼习惯:

1=不吃

2=偶尔吃

3=经常吃

4=天天吃

**B15.4**

B15.5 豆类食品:

1=不吃

2=偶尔吃

3=经常吃

4=天天吃

**B15.5**

B15.6 奶或奶制品:

1=不吃

2=偶尔吃

3=经常吃

4=天天吃

**B15.6**

B15.7 吃蔬菜习惯:

1=不吃

2=偶尔吃

3=经常吃

4=天天吃

**B15.7**

B15.8 吃水果习惯:

1=不吃

2=偶尔吃

3=经常吃

4=天天吃

**B15.8**

B15.9 饮水习惯:

1=白水

2=喝咖啡为主

3=喝饮料为主

4=喝茶为主

**B15.9**

B15.10 平均每天饮水多少杯(220ml 一杯, 含水、果汁、茶等)?

**B15.10**

1=至少 3 杯

2=3-5 杯

3=5 杯以上

**B16** 您是否服用保健品?  **B16**

1=从不服用 2=偶尔服用 3=经常服用

**B17** 您是否喝酒?  **B17**

1=不喝酒 2=现在经常喝酒 3=过去经常喝, 已戒

**B18** 您是否吸烟?  **B18**

1=从不吸烟 2=现在吸烟(>5支/天) 3=偶尔吸烟 4=过去吸, 已戒(不吸烟1个月以上)

**B19** 您既往工作或居住场所是否有人吸烟?  **B19**

1=没有 2=工作有 3=居住有 4=都有

**B20** 您现在是否养宠物? 1=否 2=是  **B20**

**B21** 您现在是否感觉到有生活压力? 1=是 2=否(跳问 B22)  **B21**

**B21.1** 主要的压力来源是什么? (多选)  **B21.1**

1=个人发展 2=经济 3=个人情感 4=家庭 5=纠纷、官司

6=人际关系 7=健康 8=其他\_\_\_\_\_ B21.1oth

**B22** 您参加了下列社会组织与活动吗?

| 组织类型           | 请选择以下选项 |        |       |                                |
|----------------|---------|--------|-------|--------------------------------|
| B22.1 专业技术组织   | 1 积极成员  | 2 一般成员 | 3 未参加 | <input type="checkbox"/> B22.1 |
| B22.2 运动/娱乐组织  | 1 积极成员  | 2 一般成员 | 3 未参加 | <input type="checkbox"/> B22.2 |
| B22.3 志愿公益服务组织 | 1 积极成员  | 2 一般成员 | 3 未参加 | <input type="checkbox"/> B22.3 |
| B22.4 其他组织     | 1 积极成员  | 2 一般成员 | 3 未参加 | <input type="checkbox"/> B22.4 |

**B23** 您是否有宗教信仰? 1=是 2=否  **B23**

## C 身体情况

C1 您对自己的健康情况满意吗?  C1

非常不满意 非常满意

|   |   |   |   |   |   |   |   |   |    |
|---|---|---|---|---|---|---|---|---|----|
| 1 | 2 | 3 | 4 | 5 | 6 | 7 | 8 | 9 | 10 |
|---|---|---|---|---|---|---|---|---|----|

请描述您近一年来的身体情况:

C2 您的视力有减退吗?  C2

1=没有      2=有, 但不影响日常生活      3=有减退, 且影响日常生活

C3 您现在是否佩戴眼镜?    1=否    2=近视镜    3=花镜    4=近视镜+花镜  C3

C4 您的听力有减退吗?  C4

1=没有      2=有, 但不影响日常生活      3=有减退,且影响日常生活

C5 您的牙齿有缺失吗?  C5

1=没有      2=有, 但不影响日常生活      3=有脱落, 且影响日常生活

C6 您是否觉得自己的记忆力有所下降?  C6

1=没有      2=下降, 但不影响日常生活      3=下降, 且影响日常生活

C7 您的食欲如何?                      1=减退      2=一般      3=好  C7

C8 您是否有排便困难的情况?              1=否      2=是  C8

C9 您是否有大便失禁?    1=没有      2=偶尔      3=经常  C9

C10 您是否有尿失禁?    1=没有      2=偶尔      3=经常  C10

C11 您现有哪些主要不适?    1=没有(跳问C12)    2=有 如有请点以下选项  C11no

|                                           |                                             |                                         |
|-------------------------------------------|---------------------------------------------|-----------------------------------------|
| C11.1 乏力 <input type="checkbox"/> C11.1   | C11.2 疼痛 <input type="checkbox"/> C11.2     | C11.3 过敏 <input type="checkbox"/> C11.3 |
| C11.4 眼部疲劳 <input type="checkbox"/> C11.4 | C11.5 情感低落 <input type="checkbox"/> C11.5   | C11.6 冲动 <input type="checkbox"/> C11.6 |
| C11.7 烦躁 <input type="checkbox"/> C11.7   | C11.8 注意力不集中 <input type="checkbox"/> C11.8 | C11.9 其它_____C11.9oth                   |

**C12** 请选择以下符合对您个人特征的描写及符合的程度。

|                             | 完全不<br>符合 | 比较不<br>符合 | 有点不<br>符合 | 说不<br>清 | 有点<br>符合 | 比较<br>符合 | 完全<br>符合 |                                |
|-----------------------------|-----------|-----------|-----------|---------|----------|----------|----------|--------------------------------|
| E1.1 外向的, 热情的               | ①         | ②         | ③         | ④       | ⑤        | ⑥        | ⑦        | <input type="checkbox"/> E1.1  |
| E1.2 爱挑剔的, 好争论              | ①         | ②         | ③         | ④       | ⑤        | ⑥        | ⑦        | <input type="checkbox"/> E1.2  |
| E1.3 可靠的, 自律的               | ①         | ②         | ③         | ④       | ⑤        | ⑥        | ⑦        | <input type="checkbox"/> E1.3  |
| E1.4 焦虑的, 易心烦的              | ①         | ②         | ③         | ④       | ⑤        | ⑥        | ⑦        | <input type="checkbox"/> E1.4  |
| E1.5 容易接纳新事物的, 能<br>容忍复杂事物的 | ①         | ②         | ③         | ④       | ⑤        | ⑥        | ⑦        | <input type="checkbox"/> E1.5  |
| E1.6 保守的, 安静的               | ①         | ②         | ③         | ④       | ⑤        | ⑥        | ⑦        | <input type="checkbox"/> E1.6  |
| E1.7 有同情心的, 热心的             | ①         | ②         | ③         | ④       | ⑤        | ⑥        | ⑦        | <input type="checkbox"/> E1.7  |
| E1.8 条理不清的, 粗心的             | ①         | ②         | ③         | ④       | ⑤        | ⑥        | ⑦        | <input type="checkbox"/> E1.8  |
| E1.9 平静的, 情绪稳定的             | ①         | ②         | ③         | ④       | ⑤        | ⑥        | ⑦        | <input type="checkbox"/> E1.9  |
| E1.10 传统的, 枯燥的              | ①         | ②         | ③         | ④       | ⑤        | ⑥        | ⑦        | <input type="checkbox"/> E1.10 |

**C13** 以下对死亡的态度您同意吗? 同意程度如何?

|                            | 完全不<br>同意 | 比较不<br>同意 | 有点不<br>同意 | 说不<br>清 | 有点<br>同意 | 比较<br>同意 | 完全<br>同意 |                               |
|----------------------------|-----------|-----------|-----------|---------|----------|----------|----------|-------------------------------|
| E2.1 死亡意味着一切<br>的结束, 令我害怕。 | ①         | ②         | ③         | ④       | ⑤        | ⑥        | ⑦        | <input type="checkbox"/> E2.1 |
| E2.2 我总是试着不要<br>想到死亡。      | ①         | ②         | ③         | ④       | ⑤        | ⑥        | ⑦        | <input type="checkbox"/> E2.2 |
| E2.3 我盼望死后能和<br>我所爱的人团聚。   | ①         | ②         | ③         | ④       | ⑤        | ⑥        | ⑦        | <input type="checkbox"/> E2.3 |
| E2.4 死亡只是生命过<br>程的一部分。     | ①         | ②         | ③         | ④       | ⑤        | ⑥        | ⑦        | <input type="checkbox"/> E2.4 |
| E2.5 我视死亡为现世<br>痛苦的解脱。     | ①         | ②         | ③         | ④       | ⑤        | ⑥        | ⑦        | <input type="checkbox"/> E2.5 |

## D 医疗与患病

D 1 您是否患有下列疾病？如果全部没有请在D1框内打√

D1no

| 疾病名称                      | 是否有病<br>有，在○打√ 没有，不填         |
|---------------------------|------------------------------|
| D 1.1 高血压                 | <input type="radio"/> D 1.1  |
| D 1.2 糖尿病                 | <input type="radio"/> D 1.2  |
| D 1.3 心脏病                 | <input type="radio"/> D 1.3  |
| D 1.4 中风及脑血管疾病            | <input type="radio"/> D 1.4  |
| D 1.5 支气管炎，肺气肿，哮喘病或肺炎     | <input type="radio"/> D 1.5  |
| D 1.6 肺结核                 | <input type="radio"/> D 1.6  |
| D 1.7 白内障                 | <input type="radio"/> D 1.7  |
| D 1.8 慢性肾炎                | <input type="radio"/> D 1.8  |
| D 1.9 癌症                  | <input type="radio"/> D 1.9  |
| D 1.10 颈腰椎疾病              | <input type="radio"/> D 1.10 |
| D 1.11 胃肠疾病               | <input type="radio"/> D 1.11 |
| D 1.12 帕金森氏病              | <input type="radio"/> D 1.12 |
| D 1.13 跌倒                 | <input type="radio"/> D 1.13 |
| D 1.14 关节炎                | <input type="radio"/> D 1.14 |
| D 1.15 痴呆                 | <input type="radio"/> D 1.15 |
| D 1.16 肢体残疾               | <input type="radio"/> D 1.16 |
| D 1.17 代谢紊乱（血糖、血脂、尿酸水平升高） | <input type="radio"/> D 1.17 |
| D 1.18 其他，请说明             | <input type="radio"/> D 1.18 |

**D2** 您过去一年到医院或诊所看过病吗? 1=无 2=\_\_\_\_\_次 D2a  D2

**D3** 您最近两年是否住过院? 1=无 2=\_\_\_\_\_次 D3a  D3

**D4** 您现在经常服用的药物有几种? 1=无 2=\_\_\_\_\_种 D4a  D4

**D5** 您现在参加了以下哪些医疗保险? (多选题)  D5

1=基本医疗保险(职工基本医疗保险、城镇居民基本医疗保险、新型农村合作医疗、  
城乡居民基本医疗保险) 2=城乡居民大病医疗保险 3=公费医疗  
4=商业医疗保险 5=都没有

**D6** 过去一年您自费共花了\_\_\_\_\_元医疗费? (仅个人自费部分, 含看病、住院、买药)

D6

**D7** 您觉得去医院(诊所)看病方便吗?  D7

1=非常方便 2=比较方便 3=一般 4=不太方便 5=很不方便

**D8** 当您感冒时通常会如何处理?  D8

1=马上就医 2=通过网上或其他方式询医问药 3=自己买药或自我治疗

4=观察几天, 暂不处理 5=完全不处理, 等待自愈 6=其他\_\_\_\_\_ D8oth

**D9** 您多长时间做一次体检?  D9

1=不做 2=每年一次 3=每两年一次 4=不定期

**D10** 您 18 岁以后是否打过疫苗?  D10

1=没有 2=打过 3=记不清

**D11** 您对健康怎样理解?  D11

1=健康就是无病无伤无残的状态

2=医院和医生是维护健康的主要依靠

3=维护好健康是一种自我责任

4=养生保健是维护健康的主要方式

**D12** 请选择以下您认同的情况和认同程度。

|                            | 非常不同意 | 不同意 | 说不清 | 同意 | 非常同意 |                               |
|----------------------------|-------|-----|-----|----|------|-------------------------------|
| E3.1 在经历艰难困苦后，我能很快地恢复过来。   | 1     | 2   | 3   | 4  | 5    | <input type="checkbox"/> E3.1 |
| E4.1 年纪越大就越没用。             | 1     | 2   | 3   | 4  | 5    | <input type="checkbox"/> E4.1 |
| E4.2 老年和年轻时一样幸福。           | 1     | 2   | 3   | 4  | 5    | <input type="checkbox"/> E4.2 |
| E4.3 在当今社会，老年人的价值没有得到充分发挥。 | 1     | 2   | 3   | 4  | 5    | <input type="checkbox"/> E4.3 |
| E4.4 老年人是社会的负担。            | 1     | 2   | 3   | 4  | 5    | <input type="checkbox"/> E4.4 |

**D13** 请选择以下符合您的情况。

|                          | 回答   |       |     |      |     |                               |
|--------------------------|------|-------|-----|------|-----|-------------------------------|
| E5.1 当我遇到困难，总有可信赖的朋友帮助我。 | ①不符合 | ②较不符合 | ③一般 | ④较符合 | ⑤符合 | <input type="checkbox"/> E5.1 |
| E5.2 我善解人意。              | ①不符合 | ②较不符合 | ③一般 | ④较符合 | ⑤符合 | <input type="checkbox"/> E5.2 |
| E5.3 我的心情通常很轻松、愉快。       | ①不符合 | ②较不符合 | ③一般 | ④较符合 | ⑤符合 | <input type="checkbox"/> E5.3 |
| E5.4 我对新事物感兴趣。           | ①不符合 | ②较不符合 | ③一般 | ④较符合 | ⑤符合 | <input type="checkbox"/> E5.4 |

## E 心理部分

**E6** 请确定过去的一周中最符合您的实际情况

| 请依次对下列陈述做出回答                               | 不<br>符合 | 有些<br>符合 | 符合 | 非常<br>符合 |                                |
|--------------------------------------------|---------|----------|----|----------|--------------------------------|
| E6.1 我觉得很难让自己平静下来。                         | 0       | 1        | 2  | 3        | <input type="checkbox"/> E6.1  |
| E6.2 我感到口干舌燥。                              | 0       | 1        | 2  | 3        | <input type="checkbox"/> E6.2  |
| E6.3 我好像不再有愉快的感觉。                          | 0       | 1        | 2  | 3        | <input type="checkbox"/> E6.3  |
| E6.4 我感到呼吸困难(比如在没有剧烈运动的情况下, 也会感到呼吸急促, 气喘)。 | 0       | 1        | 2  | 3        | <input type="checkbox"/> E6.4  |
| E6.5 我觉得很难找到动力去学习。                         | 0       | 1        | 2  | 3        | <input type="checkbox"/> E6.5  |
| E6.6 我对事情往往过度反应。                           | 0       | 1        | 2  | 3        | <input type="checkbox"/> E6.6  |
| E6.7 我感到颤抖(比如双手发抖)。                        | 0       | 1        | 2  | 3        | <input type="checkbox"/> E6.7  |
| E6.8 我觉得自己消耗了很多精力。                         | 0       | 1        | 2  | 3        | <input type="checkbox"/> E6.8  |
| E6.9 我忧虑一些会让自己恐慌或出丑的场合。                    | 0       | 1        | 2  | 3        | <input type="checkbox"/> E6.9  |
| E6.10 我觉得自己对将来没有什么可盼望的。                    | 0       | 1        | 2  | 3        | <input type="checkbox"/> E6.10 |
| E6.11 我感到忐忑不安。                             | 0       | 1        | 2  | 3        | <input type="checkbox"/> E6.11 |
| E6.12 我觉得很难放松自己。                           | 0       | 1        | 2  | 3        | <input type="checkbox"/> E6.12 |
| E6.13 我感到忧郁、沮丧。                            | 0       | 1        | 2  | 3        | <input type="checkbox"/> E6.13 |
| E6.14 我无法容忍任何阻碍我继续学习的事情。                   | 0       | 1        | 2  | 3        | <input type="checkbox"/> E6.14 |
| E6.15 我觉得自己快要得恐慌症了(没有原因地感到恐惧, 惊慌)。         | 0       | 1        | 2  | 3        | <input type="checkbox"/> E6.15 |
| E6.16 我对任何事都没有热情。                          | 0       | 1        | 2  | 3        | <input type="checkbox"/> E6.16 |
| E6.17 我觉得自己不怎么配做人。                         | 0       | 1        | 2  | 3        | <input type="checkbox"/> E6.17 |
| E6.18 我觉得自己很容易被触怒。                         | 0       | 1        | 2  | 3        | <input type="checkbox"/> E6.18 |
| E6.19 在没有运动或劳动时, 我也觉得自己的心跳不正常(比如心跳过快)。     | 0       | 1        | 2  | 3        | <input type="checkbox"/> E6.19 |
| E6.20 我无缘无故地感到害怕。                          | 0       | 1        | 2  | 3        | <input type="checkbox"/> E6.20 |
| E6.21 我感到生命毫无意义。                           | 0       | 1        | 2  | 3        | <input type="checkbox"/> E6.21 |

## F 经济状况

F1 您最主要的两项生活来源是什么？  F1a  F1b

第一位\_\_\_\_\_ F1a 第二位\_\_\_\_\_ F1b

1=劳动所得或工资 2=离/退休金/养老金 3=学生贷款/助学金 4=配偶/伴侣收入  
5=子女资助 6=父母资助 7=其他亲属资助 8= 政府/社团的救助/补贴/资助  
9=积蓄或财产性收入(利息、租金等) 10=其他\_\_\_\_\_ F1oth

F2 您去年个人的总收入是\_\_\_\_\_万元 F2a； 您去年平均每月花了\_\_\_\_\_元 F2b。

F3 您的经济状况怎么样？  F3

1=非常宽裕 2=比较宽裕 3=基本够用 4=比较困难 5=非常困难

F4 目前您参加了哪些养老保险项目？（多选）  F4

1=职工基本养老保险 2=机关事业单位养老保险 3=城乡居民基本养老保险（城镇居民社会养老保险和新型农村社会养老保险） 4=企业年金/职业年金 5=商业养老保险  
6=都没有

F5 您有产权属于自己的房子吗？ 1=有 2=无  F5

## G 社会网络和支持

G1 您目前在世的亲属有以下哪些？（多选）  G1

1=父亲 2=母亲 3=兄弟姐妹， \_\_\_\_\_人 G1a 4=配偶 5=儿子， \_\_\_\_\_人 G1b  
6=女儿， \_\_\_\_\_人 G1c 7=（外）祖父母 8=（外）孙子女 9=配偶的父母  
10=配偶的兄弟姐妹 11=曾（外）祖父母 12=曾（外）孙子女 13=其他亲戚  
14=都没有

G2 以下哪些人和您同吃同住(多选)：  G2

1=父母 2=兄弟姐妹 3=配偶/未婚伴侣 4=子女 5=媳/婿  
6=配偶的父母 7=祖父母 8=孙辈子女 9=孙辈子女的配偶  
10=兄弟姐妹的配偶 11=其他亲属 12=其他非亲属 13=独居

**G3** 您和家庭成员交流得多吗？

|            | 经常 | 一般 | 很少 | 不适用 |                               |
|------------|----|----|----|-----|-------------------------------|
| G3.1 与父亲   | 1  | 2  | 3  | 4   | <input type="checkbox"/> G3.1 |
| G3.2 与母亲   | 1  | 2  | 3  | 4   | <input type="checkbox"/> G3.2 |
| G3.3 与子女   | 1  | 2  | 3  | 4   | <input type="checkbox"/> G3.3 |
| G3.4 与兄弟姐妹 | 1  | 2  | 3  | 4   | <input type="checkbox"/> G3.4 |

**G4** 您和您配偶的关系如何？

G4

1=非常满意 2=比较满意 3=一般 4=不太满意 5=非常不满意 6=不适用

**G5** 您对自己工作单位的人际关系满意吗？

|          | 非常满意 | 比较满意 | 一般 | 不太满意 | 非常不满意 | 不适用 |                               |
|----------|------|------|----|------|-------|-----|-------------------------------|
| G5.1 与上级 | 1    | 2    | 3  | 4    | 5     | 6   | <input type="checkbox"/> G5.1 |
| G5.2 与同级 | 1    | 2    | 3  | 4    | 5     | 6   | <input type="checkbox"/> G5.2 |
| G5.3 与下属 | 1    | 2    | 3  | 4    | 5     | 6   | <input type="checkbox"/> G5.3 |

**G6** 当您遇到下列情况时最先想要找谁帮忙？

|              | 近亲属 | 其他<br>亲属 | 朋友 /<br>同事 | 社会<br>机构 | 没人<br>可找 | 谁也<br>不找 |                               |
|--------------|-----|----------|------------|----------|----------|----------|-------------------------------|
| G6.1 心情不好想聊聊 | 1   | 2        | 3          | 4        | 5        | 6        | <input type="checkbox"/> G6.1 |
| G6.2 有大事要商量  | 1   | 2        | 3          | 4        | 5        | 6        | <input type="checkbox"/> G6.2 |
| G6.3 需要借一大笔钱 | 1   | 2        | 3          | 4        | 5        | 6        | <input type="checkbox"/> G6.3 |
| G6.4 生病严重需照顾 | 1   | 2        | 3          | 4        | 5        | 6        | <input type="checkbox"/> G6.4 |

**G7** 常常有人找您商量大事吗？

G7

1=经常 2=不太多 3=很少 4=几乎没有

**G8** 日常一天里您大概和多少人接触？（包括点头、打招呼、交谈、打电话、写信、网上联系都算在一起）

G8

1=0人 2=1-4人 3=5-9人 4=10-19人 5=20-49人 6=50人及以上

**G9** 您手机、电话通讯录上有多少人？\_\_\_\_\_人 G9a；其中关系密切的朋友\_\_\_\_\_人 G9b。

**G10** 您同意社会上绝大多数人是可以信任的吗？

G10

1=非常同意 2=比较同意 3=不太同意 4=非常不同意 5=不好说

**G11** 评价一下您与亲属、朋友交往中提供帮助和支持的情况？

|             | 我得到帮助更多 | 我提供帮助更多 | 大致相当 | 说不清 |                                |
|-------------|---------|---------|------|-----|--------------------------------|
| G11.1 近亲属   | 1       | 2       | 3    | 4   | <input type="checkbox"/> G11.1 |
| G11.2 其他亲属  | 1       | 2       | 3    | 4   | <input type="checkbox"/> G11.2 |
| G11.3 朋友/同事 | 1       | 2       | 3    | 4   | <input type="checkbox"/> G11.3 |

**G12** 您对以下社会服务的需求和使用情况。

| 服务项目        | 是否需要              | 是否用过              | 是否满意                      |
|-------------|-------------------|-------------------|---------------------------|
|             | 1=是(跳问同行是否用过) 0=否 | 1=是(跳问同行是否满意) 0=否 | 1=满意 2=一般<br>3=不满意 4=无法回答 |
| G12.1 托育服务  | [___]G12.1a       | [___]G12.1b       | [___]G12.1c               |
| G12.2 学前教育  | [___]G12.2a       | [___]G12.2b       | [___]G12.2c               |
| G12.3 就业培训  | [___]G12.3a       | [___]G12.3b       | [___]G12.3c               |
| G12.4 健康教育  | [___]G12.4a       | [___]G12.4b       | [___]G12.4c               |
| G12.5 心理咨询  | [___]G12.5a       | [___]G12.5b       | [___]G12.5c               |
| G12.6 法律援助  | [___]G12.6a       | [___]G12.6b       | [___]G12.6c               |
| G12.7 家政服务  | [___]G12.7a       | [___]G12.7b       | [___]G12.7c               |
| G12.8 上门看病  | [___]G12.8a       | [___]G12.8b       | [___]G12.8c               |
| G12.9 康复/护理 | [___]G12.9a       | [___]G12.9b       | [___]G12.9c               |
| G12.10 社区助餐 | [___]G12.10a      | [___]G12.10b      | [___]G12.10c              |
| G12.11 托老所  | [___]G12.11a      | [___]G12.11b      | [___]G12.11c              |

## H 居住环境

**H1** 您现在住房在什么位置?  H1

1=市/县城的中心城区    2=市/县城的边缘城区    3=市/县城的城乡结合部  
4=市/县城区以外的镇    5=农村    6=其他\_\_\_\_\_ H10th

**H2** 您现在居住的社区类型属于下列哪一种?  H2

1=未经改造的街坊型老住区    2=单位家属区    3=保障房小区    4=普通商品房小区  
5=别墅区或高级住宅区    6=村改居、村居合并或“城中村”    7=农村自建房  
8=其他\_\_\_\_\_ H20th

**H3** 您的住房属于哪种类型?  H3

1=无电梯楼房\_\_\_\_层 H3a    2=有电梯楼房\_\_\_\_层 H3b    3=平房    4=其他\_\_\_\_\_ H30th

**H4** 您现在住的房子建筑面积 \_\_\_\_\_平方米 H4a; 住了\_\_\_\_\_年 H4b。

**H5** 您对目前的住房状况满意吗?  H5

1=非常满意 (跳问 H7)    2=比较满意    3=一般    4=不太满意    5=非常不满意

**H6** 您对这个房子哪些方面不太满意? (多选)  H6

1=没电梯    2=没有无障碍坡道    3=面积小    4=通风采光不好    5=噪音大  
6=地面滑/有高差    7=洗澡不方便    8=上厕所不方便    9=做饭不方便  
10=没有紧急呼叫设备    11=上网信号不好

**H7** 您家步行十五分钟范围内有哪些设施? (多选题)

|            |                                              |                               |
|------------|----------------------------------------------|-------------------------------|
| H7.1 生活类   | 1=公交车站/地铁站    2=商场/超市/菜市场    3=餐馆/食堂    4=公厕 | <input type="checkbox"/> H7.1 |
| H7.2 文体类   | 1=公园/绿地    2=运动场馆/场地    3=老年活动中心/站           | <input type="checkbox"/> H7.2 |
| H7.3 医养类   | 1=医院/诊所    2=药店    3=养老院/老年日间照料中心            | <input type="checkbox"/> H7.3 |
| H7.4 教育类   | 1=幼儿园    2=小学/中学                             | <input type="checkbox"/> H7.4 |
| H7.5 邮电金融类 | 1=银行    2=邮局    3=快递送达设施                     | <input type="checkbox"/> H7.5 |

**H8** 您对所居住社区环境最不满意的有下列哪些方面? (多选题)  H8

1=绿化    2=卫生    3=治安    4=道路/照明    5=邻里关系    6=物业服务  
7=活动场地    8=社区活动    9=生活不方便    10=其他\_\_\_\_\_ H80th    11=都没有

**H9** 总的来说,您对所居住社区环境满意吗?  H9

1=非常满意    2=比较满意    3=一般    4=不太满意    5=非常不满

H10 请调查者填写确认：1=A-H 部分已完成 2=未完成 3=作废

H10

## I 日常生活能力 (I-J 部分适用于 50 岁及以上年龄的人群)

I1 您日常生活中会有以下问题吗？

| 项目        | 可自理           | 轻度依赖                            | 中度依赖                         | 不能自理               | 判断评分                          |
|-----------|---------------|---------------------------------|------------------------------|--------------------|-------------------------------|
| I1.1 修饰   | 独立完成<br>1     | —<br>2                          | 在协助下和适当的时间内，能完成部分梳洗活动<br>3   | 完全需要帮助<br>4        | <input type="checkbox"/> I1.1 |
| I1.2 洗澡   | 独立完成<br>1     | 洗澡需要协助<br>2                     | 洗澡需要协助<br>3                  | 完全需要帮助<br>4        | <input type="checkbox"/> I1.2 |
| I1.3 用厕   | 不需协助，可自控<br>1 | 偶尔失禁，但基本上能如厕或使用便具<br>2          | 经常失禁，在很多提示和协助下尚能如厕或使用便具<br>3 | 完全失禁、完全需要帮助<br>4   | <input type="checkbox"/> I1.3 |
| I1.4 穿衣   | 独立完成<br>1     | —<br>2                          | 需要协助，在适当的时间内完成部分穿衣<br>3      | 完全需要帮助<br>4        | <input type="checkbox"/> I1.4 |
| I1.5 吃饭   | 独立完成<br>1     | —<br>2                          | 需要协助，如切碎，搅拌食物等<br>3          | 完全需要帮助<br>4        | <input type="checkbox"/> I1.5 |
| I1.6 室内行走 | 独立完成所有活动<br>1 | 借助较小的外力或辅助装置能完成站立、行走、上下楼梯等<br>2 | 借助较大的外力才能完成站立、行走、不能上下楼梯<br>3 | 卧床不起，活动完全需要帮助<br>4 | <input type="checkbox"/> I1.6 |

I2 您处理以下事物需要帮助吗？

| 项目             | 1 不需要帮助 | 2 需要一些帮助 | 3 完全做不了 |                               |
|----------------|---------|----------|---------|-------------------------------|
| I2.1 上街购物      | 1 不需要帮助 | 2 需要一些帮助 | 3 完全做不了 | <input type="checkbox"/> I2.1 |
| I2.2 家务        | 1 不需要帮助 | 2 需要一些帮助 | 3 完全做不了 | <input type="checkbox"/> I2.2 |
| I2.3 交通        | 1 不需要帮助 | 2 需要一些帮助 | 3 完全做不了 | <input type="checkbox"/> I2.3 |
| I2.4 使用手机、电话能力 | 1 不需要帮助 | 2 需要一些帮助 | 3 完全做不了 | <input type="checkbox"/> I2.4 |
| I2.5 服用药物      | 1 不需要帮助 | 2 需要一些帮助 | 3 完全做不了 | <input type="checkbox"/> I2.5 |
| I2.6 处理财务      | 1 不需要帮助 | 2 需要一些帮助 | 3 完全做不了 | <input type="checkbox"/> I2.6 |

|           |         |          |         |                               |
|-----------|---------|----------|---------|-------------------------------|
| I2.7 电子支付 | 1 不需要帮助 | 2 需要一些帮助 | 3 完全做不了 | <input type="checkbox"/> I2.7 |
|-----------|---------|----------|---------|-------------------------------|

## J 认知评估

|                                                                                                                                                                                                                                                                                                                                                                                                                                     |              |              |              |               |              |
|-------------------------------------------------------------------------------------------------------------------------------------------------------------------------------------------------------------------------------------------------------------------------------------------------------------------------------------------------------------------------------------------------------------------------------------|--------------|--------------|--------------|---------------|--------------|
| <p><b>J1.1 注意</b>（每个词 1 分，满分 5 分）得分：_____/5 <span style="float: right;"><input type="checkbox"/> J1.1</span></p> <p>J1.1a 指导语：“现在做一个记忆力检查。我会念出几个词，请认真听。我念完后，请重复一遍记住，过一会儿我还要问您。” <span style="float: right;"><input type="checkbox"/> J1.1a</span></p>                                                                                                                                                                               |              |              |              |               |              |
| 1=鼻子                                                                                                                                                                                                                                                                                                                                                                                                                                | 2=丝绸         | 3=寺庙         | 4=菊花         | 5=红色          |              |
| <p><b>J1.2 执行功能/言语</b>（每个动物 0.5 分，满分 9 分）得分：_____/9 <span style="float: right;"><input type="checkbox"/> J1.2</span></p> <p>指导语：“接下来，请告诉我尽可能多的动物的名字。您可以说想起来的任何动物。时间是 1 分钟。请准备好[稍作停顿]。现在，请开始。[同时计时 1 分钟]。停。”</p>                                                                                                                                                                                                                     |              |              |              |               |              |
| <p>J1.2a 流畅性：在 1 分钟内尽可能多的说出动物的名字。正确回答个数 [    ] <span style="float: right;"><input type="checkbox"/> J1.2a</span></p>                                                                                                                                                                                                                                                                                                                |              |              |              |               |              |
| <p><b>J1.3 定向</b>（每题 1 分，满分 6 分）得分：_____/6 <span style="float: right;"><input type="checkbox"/> J1.3</span></p> <p>J1.3a 指导语：“告诉我今天的日期”。如果受试者没有说出完整的答案，则提示说：“告诉我今天是哪一年，哪一月，几号，星期几。”然后说：“现在，告诉我这个地方的名字，和这个城市的名字。”</p> <p><input type="checkbox"/> J1.3a</p>                                                                                                                                                                          |              |              |              |               |              |
| <p>日[    ]    月[    ]    年[    ]    星期几[    ]    地点[    ]    城市[    ]</p>                                                                                                                                                                                                                                                                                                                                                           |              |              |              |               |              |
| <p><b>J1.4 记忆</b>（每个词语最高 2 分，满分 10 分）得分：_____/10 <span style="float: right;"><input type="checkbox"/> J1.4</span></p> <p>J1.4a 指导语：无提示回忆——“之前，我曾经给您读过几个词，让您记住。现在把您还能想起来的词都告诉我。” J1.4b 对于没有回忆出的词语，给出分类提示。如果受试者在分类提示下仍然没有回忆出来，则给多选提示。例如：“您觉得这些词里，哪一个是我刚才读过的？[清晰读出：]鼻子，手掌，面孔。”无提示下，回忆正确的词语，每个 2 分。分类或多选提示下，回忆正确的词语，每个 1 分。 <span style="float: right;"><input type="checkbox"/> J1.4a</span></p> <p><input type="checkbox"/> J1.4b</p> |              |              |              |               |              |
|                                                                                                                                                                                                                                                                                                                                                                                                                                     | 1=鼻子         | 2=丝绸         | 3=寺庙         | 4=菊花          | 5=红色         |
| 无提示                                                                                                                                                                                                                                                                                                                                                                                                                                 |              |              |              |               |              |
| 分类提示                                                                                                                                                                                                                                                                                                                                                                                                                                | 身体的一部分       | 一种纺织品        | 一种建筑物        | 一种花           | 一种颜色         |
| 多选提示                                                                                                                                                                                                                                                                                                                                                                                                                                | 鼻子，面孔，<br>手掌 | 尼龙，棉布，<br>丝绸 | 寺庙，学校，<br>医院 | 玫瑰，菊花，<br>郁金香 | 红色，蓝色，<br>绿色 |

总得分 (满分 30 分): \_\_\_\_\_

J1

J2 请调查者填写确认: 1=A-J 部分已完成 2=未完成 3=作废

J2

## K 体格与体能测试

K1 体重 \_\_\_\_\_ 公斤  K1

K2 身高 \_\_\_\_\_ 厘米  K2

K3 腰围 \_\_\_\_\_ 厘米  K3

K4 臀围 \_\_\_\_\_ 厘米  K4

K5 血压 \_\_\_\_\_ / \_\_\_\_\_ mm Hg  K5a /  K5b

K6 握力 (两次取最大值) 1=无法完成 2=完成  K6

K6.1 左手 \_\_\_\_\_ 公斤 / K6.2 右手 \_\_\_\_\_ 公斤  K6.1 /  K6.2

K6.3 惯用手: 1=左手 2=右手  K6.3

K7 步速测定 日常速度走 6 米时间 \_\_\_\_\_ 秒 K7a  .  K7a

6 米步数 \_\_\_\_\_ 步 K7b  K7b

K7.1 使用行走辅具: 1=否 2=是  K7.1

K7.2 仅在 75 岁以下年龄组中进行:

最快速度走 6 米时间 \_\_\_\_\_ 秒 K7.2a  .  .  K7.2a

最快速度 6 米步数 \_\_\_\_\_ 步 K7.2b  .  K7.2b

K8 起立行走试验: 要求受试者从有扶手 (65cm) 的椅子, 座高 46cm 的椅子上站起, 走 3 米, 转身走回来, 坐下, 可用拐杖或助行器, 但不能搀扶。  K8

1=无法完成 2=拒绝 3=完成

K8.1 所用时间: \_\_\_\_\_ 秒  .  K8.1

K9 三姿站立测评

K9.1 睁眼双脚并拢站立 10 秒, 完成 \_\_\_\_\_ 秒  K9.1

K9.2 睁眼双脚错位站立 10 秒, 完成 \_\_\_\_\_ 秒  K9.2

K9.3 睁眼双脚前后一线站立 10 秒, 完成 \_\_\_\_\_ 秒  K9.3

K10 闭眼双脚提踵站立 完成 \_\_\_\_\_ 秒  K10

K11 起坐时间测试: 从椅子上站起, 让其尽快地起立 5 次。  K11

1=完成 2=部分完成 3=没完成

完成 \_\_\_\_\_ 秒 K11a

.   K11a

**K12 光反应时测试:**

手: \_\_\_\_\_ 秒 K12a

.   K12a

脚: \_\_\_\_\_ 秒 K12b

.   K12b

**L 辅助检测**

(仅在调查对象为体检对象, 有同样常规体检项目时填写相关信息)

**L1 心电图:**

L1

1=未检测 (跳转 L2)      2=检测

L1.1      1=未见异常      2=有异常发现

L1.1

**L2 眼底镜检:**

L2

1=未检测 (跳转 L3)      2=检测

L2

L2.1 眼底动脉硬化:    1= 有      2= 无

L2.1

**L3 腹部超声:**

1=未检测 (跳转 L4)      2=检测

L3

L3.1      1=未见异常      2=有异常发现

L3.1

L3.2 设备型号 \_\_\_\_\_

L3.2

**L4 BIA**

L4

1=未检测 (跳转 L5)      2=检测

L4.1 检测序号 \_\_\_\_\_

L4.1

**L5 DAXE**

1=未检测 (跳转 L6)      2=检测

L5

L5.1 检测序号 \_\_\_\_\_

L5.1

**L6 脑部核磁**

1=未检测 (跳转 M)      2=检测

L6

L6.1 检测序号 \_\_\_\_\_

L6.1

## M 实验室检查

|                |           |                      |                              |
|----------------|-----------|----------------------|------------------------------|
| <b>M1 血常规:</b> | 1= 已检查    | 2=未检查                | <input type="checkbox"/> M1  |
| M1a 白血球        | WBC _____ | *10 <sup>9</sup> /L  | □ □ □ □ . □ M1a              |
| M1b 红血球        | RBC _____ | *10 <sup>12</sup> /L | □ □ □ □ . □ M1b              |
| M1c 血小板        | PT _____  | *10 <sup>9</sup> /L  | □ □ □ □ . □ M1c              |
| M1d 血色素        | Hb _____  | g/L                  | □ □ □ □ . □ M1d              |
| M1e 网织红细胞      | _____     | %                    | □ □ □ □ . □ M1e              |
| <b>M2 尿常规:</b> | 1= 已检查    | 2=未检查                | <input type="checkbox"/> M2  |
| M2a 酸碱度        | PH _____  |                      | □ □ □ □ . □ M2a              |
| M2b 尿比重        | SG _____  |                      | □ □ □ □ . □ M2b              |
| M2c 尿蛋白        | Pro _____ | *g/L                 | □ □ □ □ . □ M2c              |
| M2d 葡萄糖        | _____     | mmol/L               | □ □ □ . □ □ M2d              |
| M2e 酮体         | _____     | mmol/L               | □ □ □ . □ □ M2e              |
| M2f 胆红素        | _____     | μmol/L               | □ □ □ . □ □ M2f              |
| M2g 尿胆原        | _____     | μmol/L               | □ □ □ . □ □ M2g              |
| M2h 亚硝酸盐       | _____     |                      | □ □ □ . □ □ M2h              |
| M2i 尿白细胞       | WBC _____ | 个/HP                 | □ □ □ □ . □ M2i              |
| M2j 尿红细胞       | _____     | 个/HP                 | □ □ □ . □ □ M2j              |
| <b>M3 便常规:</b> | 1= 已检查    | 2=未检查                | <input type="checkbox"/> M3  |
| M3a 潜血         | 1= 阳性(+)  | 2= 阴性(-)             | <input type="checkbox"/> M3a |

|                      |                    |                                                                                                                                    |
|----------------------|--------------------|------------------------------------------------------------------------------------------------------------------------------------|
| <b>M4</b> 血生化:       | 1= 已检查      2=未检查  | <input type="checkbox"/> M4                                                                                                        |
| <b>M5</b> 空腹血糖       | GLU _____ mmol/L   | <input type="checkbox"/> <input type="checkbox"/> <input type="checkbox"/> . <input type="checkbox"/> <input type="checkbox"/> M5  |
| <b>M6</b> 糖化血红蛋白     | HbA1c _____%       | <input type="checkbox"/> <input type="checkbox"/> <input type="checkbox"/> . <input type="checkbox"/> <input type="checkbox"/> M6  |
| <b>M7</b> 糖化血清蛋白     | _____ μmol/L       | <input type="checkbox"/> <input type="checkbox"/> <input type="checkbox"/> . <input type="checkbox"/> <input type="checkbox"/> M7  |
| <b>M8</b> 甘油三脂       | TG _____ mmol/L    | <input type="checkbox"/> <input type="checkbox"/> <input type="checkbox"/> . <input type="checkbox"/> <input type="checkbox"/> M8  |
| <b>M9</b> 总胆固醇       | TC _____ mmol/L    | <input type="checkbox"/> <input type="checkbox"/> <input type="checkbox"/> . <input type="checkbox"/> <input type="checkbox"/> M9  |
| <b>M10</b> 高密度脂蛋白    | HDL-C _____ mmol/L | <input type="checkbox"/> <input type="checkbox"/> <input type="checkbox"/> . <input type="checkbox"/> <input type="checkbox"/> M10 |
| <b>M11</b> 低密度脂蛋白    | LDL-C _____ mmol/L | <input type="checkbox"/> <input type="checkbox"/> <input type="checkbox"/> . <input type="checkbox"/> <input type="checkbox"/> M11 |
| <b>M12</b> 血清肌酐      | Cr _____ μmol/L    | <input type="checkbox"/> <input type="checkbox"/> <input type="checkbox"/> . <input type="checkbox"/> <input type="checkbox"/> M12 |
| <b>M13</b> 血尿素氮      | BUN _____ mmol/L   | <input type="checkbox"/> <input type="checkbox"/> <input type="checkbox"/> . <input type="checkbox"/> <input type="checkbox"/> M13 |
| <b>M14</b> 血尿酸       | UA _____ μmol/L    | <input type="checkbox"/> <input type="checkbox"/> <input type="checkbox"/> . <input type="checkbox"/> <input type="checkbox"/> M14 |
| <b>M15</b> 丙氨酸氨基转移酶  | AHT _____ U/L      | <input type="checkbox"/> <input type="checkbox"/> <input type="checkbox"/> . <input type="checkbox"/> <input type="checkbox"/> M15 |
| <b>M16</b> 门冬氨酸氨基转移酶 | AST _____ U/L      | <input type="checkbox"/> <input type="checkbox"/> <input type="checkbox"/> . <input type="checkbox"/> <input type="checkbox"/> M16 |
| <b>M17</b> 总胆红素      | TBiL _____ μmol/L  | <input type="checkbox"/> <input type="checkbox"/> <input type="checkbox"/> . <input type="checkbox"/> <input type="checkbox"/> M17 |
| <b>M18</b> 总蛋白       | _____ g/L          | <input type="checkbox"/> <input type="checkbox"/> <input type="checkbox"/> . <input type="checkbox"/> <input type="checkbox"/> M18 |
| <b>M19</b> 白蛋白       | _____ g/L          | <input type="checkbox"/> <input type="checkbox"/> <input type="checkbox"/> . <input type="checkbox"/> <input type="checkbox"/> M19 |
| <b>M20</b> 前白蛋白      | _____ mg/dL        | <input type="checkbox"/> <input type="checkbox"/> <input type="checkbox"/> . <input type="checkbox"/> <input type="checkbox"/> M20 |
| <b>M21</b> 超敏 C-反应蛋白 | _____ mg/L         | <input type="checkbox"/> <input type="checkbox"/> <input type="checkbox"/> . <input type="checkbox"/> <input type="checkbox"/> M21 |
| <b>M22</b> β 2 微球蛋白  | _____ mg/L         | <input type="checkbox"/> <input type="checkbox"/> <input type="checkbox"/> . <input type="checkbox"/> <input type="checkbox"/> M22 |
| <b>M23</b> γ -谷氨酰转肽酶 | _____ U/L          | <input type="checkbox"/> <input type="checkbox"/> <input type="checkbox"/> . <input type="checkbox"/> <input type="checkbox"/> M23 |
| <b>M24</b> 总胆汁酸      | _____ μmol/L       | <input type="checkbox"/> <input type="checkbox"/> <input type="checkbox"/> . <input type="checkbox"/> <input type="checkbox"/> M24 |
| <b>M25</b> 血清乳酸脱氢酶   | _____ U/L          | <input type="checkbox"/> <input type="checkbox"/> <input type="checkbox"/> . <input type="checkbox"/> <input type="checkbox"/> M25 |
| <b>M26</b> 肌酸激酶      | _____ U/L          | <input type="checkbox"/> <input type="checkbox"/> <input type="checkbox"/> . <input type="checkbox"/> <input type="checkbox"/> M26 |

|            |             |             |                                                                                                                |
|------------|-------------|-------------|----------------------------------------------------------------------------------------------------------------|
| <b>M27</b> | 胆碱酯酶        | _____U/L    | <input type="text"/> <input type="text"/> <input type="text"/> . <input type="text"/> <input type="text"/> M27 |
| <b>M28</b> | 碱性磷酸酶       | _____U/L    | <input type="text"/> <input type="text"/> <input type="text"/> . <input type="text"/> <input type="text"/> M28 |
| <b>M29</b> | 钾           | _____mmol/L | <input type="text"/> <input type="text"/> <input type="text"/> . <input type="text"/> <input type="text"/> M29 |
| <b>M30</b> | 钠           | _____mmol/L | <input type="text"/> <input type="text"/> <input type="text"/> . <input type="text"/> <input type="text"/> M30 |
| <b>M31</b> | 氯           | _____mmol/L | <input type="text"/> <input type="text"/> <input type="text"/> . <input type="text"/> <input type="text"/> M31 |
| <b>M32</b> | 钙           | _____mmol/L | <input type="text"/> <input type="text"/> <input type="text"/> . <input type="text"/> <input type="text"/> M32 |
| <b>M33</b> | 无机磷         | _____mmol/L | <input type="text"/> <input type="text"/> <input type="text"/> . <input type="text"/> <input type="text"/> M33 |
| <b>M34</b> | 血清胱蛋白抑制剂 C  | _____mg/L   | <input type="text"/> <input type="text"/> <input type="text"/> . <input type="text"/> <input type="text"/> M34 |
| <b>M35</b> | 血清同型半胱氨酸    | _____μmol/L | <input type="text"/> <input type="text"/> <input type="text"/> . <input type="text"/> <input type="text"/> M35 |
| <b>M36</b> | 超氧化物歧化酶     | _____U/L    | <input type="text"/> <input type="text"/> <input type="text"/> . <input type="text"/> <input type="text"/> M36 |
| <b>M37</b> | 血清叶酸        | _____ng/mL  | <input type="text"/> <input type="text"/> <input type="text"/> . <input type="text"/> <input type="text"/> M37 |
| <b>M38</b> | 游离脂肪酸       | _____mmol/L | <input type="text"/> <input type="text"/> <input type="text"/> . <input type="text"/> <input type="text"/> M38 |
| <b>M39</b> | 雌二醇         | _____pg/mL  | <input type="text"/> <input type="text"/> <input type="text"/> . <input type="text"/> <input type="text"/> M39 |
| <b>M40</b> | 总睾酮         | _____ng/mL  | <input type="text"/> <input type="text"/> <input type="text"/> . <input type="text"/> <input type="text"/> M40 |
| <b>M41</b> | 胰岛素         | _____μU/mL  | <input type="text"/> <input type="text"/> <input type="text"/> . <input type="text"/> <input type="text"/> M41 |
| <b>M42</b> | 胰岛素样生长因子    | _____ng/mL  | <input type="text"/> <input type="text"/> <input type="text"/> . <input type="text"/> <input type="text"/> M42 |
| <b>M43</b> | 免疫球蛋白 M     | _____mg/dl  | <input type="text"/> <input type="text"/> <input type="text"/> . <input type="text"/> <input type="text"/> M43 |
| <b>M44</b> | 甲胎蛋白        | _____ng/mL  | <input type="text"/> <input type="text"/> <input type="text"/> . <input type="text"/> <input type="text"/> M44 |
| <b>M45</b> | 癌胚抗原        | _____ng/mL  | <input type="text"/> <input type="text"/> <input type="text"/> . <input type="text"/> <input type="text"/> M45 |
| <b>M46</b> | 鳞状上皮细胞癌相关抗原 | _____ng/mL  | <input type="text"/> <input type="text"/> <input type="text"/> . <input type="text"/> <input type="text"/> M46 |
| <b>M47</b> | D-3 羟基丁酸    | _____mmol/L | <input type="text"/> <input type="text"/> <input type="text"/> . <input type="text"/> <input type="text"/> M47 |
